# Supplementary material for: Development and validation of a novel risk model in newly diagnosed de novo bone metastatic prostate cancer (M1b): a retrospective study
Source: PeerJ. 2023 Jan 12;11:e14615. doi: 10.7717/peerj.14615 (PMC9840864; doi:10.7717/peerj.14615)
Supplement: Data S1 [file peerj-11-14615-s001.xlsx]

## Sheet: Sheet1
Number	Age	HB/DM	TPSA	nPSA	Hb	ALP	FIB	Visceral metastasis	BMS	H/LRG	EOD＞2：2 or EOD≤2 : 1	EBM	H/LVD	nPSAtime(month)	cT	Gleason	CRPCcensor	CRPCtime(month)
1	82	YES	83.34	1.62	124	321	5.06	No	6	HRG	2	YES	high	2	T4	9	1	4
2	72	NO	595.2	313.6	132	151	4.63	No	6	HRG	2	YES	high	5	T4	8	1	16
3	70	YES	65	0.48	124	147	4.92	No	5	HRG	1	NO	high	7	T2	7	0	9
4	56	YES	1118	60	124	568	4.23	No	6	HRG	2	YES	high	2	T4	9	1	5
5	66	NO	68.72	0.047	122	85	2.35	No	1	LRG	1	NO	high	11	T3	8	1	21
6	83	NO	>100	0.23	122	96	2.767	No	5	HRG	1	YES	high	6	T1	6	1	28
7	66	NO	183.3	0.765	132	285	4.89	No	5	HRG	2	YES	high	2	T4	9	1	4
8	74	NO	721.3	14.76	130	174	3.36	No	3	HRG	1	YES	high	3	T2	7	1	4
9	75	NO	0.09	0.01	107	171	6.96	No	6	HRG	1	YES	high	1	T2	9	1	21
10	78	YES	247.6	1.738	103	67	3.02	No	1	LRG	1	NO	low	11	T1	8	0	11
11	58	YES	67.75	0.62	138	75	2.97	No	1	LRG	1	NO	low	13	T4	8	1	19
12	72	YES	18.22	7.91	134	41	4.285	No	1	LRG	1	NO	low	0	T2	8	1	50
13	67	YES	97.21	0.99	142	86	2.235	No	1	LRG	1	NO	low	1	T2	7	1	46
14	80	NO	404.6	＞100	125	549	-	No	5	HRG	2	YES	high	11	T2	8	1	11
15	73	YES	18.55	1.28	127	248	7.59	No	5	HRG	2	YES	high	10	T4	8	1	17
16	65	YES	>100	1.14	136	98	4.98	No	3	HRG	1	NO	high	5	T3	8	1	11
17	59	YES	55.08	0.21	148	68	2.358	No	2	LRG	1	NO	high	8	T2	8	0	13
18	77	NO	228.6	21.23	133	92	6.6	No	1	LRG	1	NO	low	1	T3	9	1	4
19	65	NO	998.757	＜0.003	137	105	4.485	No	2	LRG	1	YES	low	21	T4	8	0	51
20	80	NO	345.7	7.31	133	165	3.27	No	1	LRG	1	NO	low	6	T4	6	1	26
21	66	YES	59.8	2.06	125	704	4.28	No	5	HRG	2	YES	high	3	T2	9	1	3
22	69	NO	9927	9.83	114	357	3.657	No	6	HRG	2	YES	high	2	T4	8	0	2
23	74	NO	163.9	0.051	99	105	—	No	3	HRG	1	NO	high	13	T3	9	0	20
24	51	NO	65.2	1.64	131	123		No	2	LRG	1	NO	low	4	T2	8	0	4
25	84	YES	>100	0.799	118	56	4.11	No	1	LRG	1	NO	low	6	T1	8	1	21
26	65	NO	525.5	0.398	99	67	2.27	No	2	LRG	1	NO	low	7	T2	9	0	12
27	73	YES	315.3	5.66	81	411	3.57	No	6	HRG	2	YES	high	0	T3	8	0	2
28	79	YES	434.1	0.001	136	102	2.84	No	1	LRG	1	NO	low	8	T3	8	0	16
29	54	NO	441.3	＜0.006	143	1124	2.91	No	6	HRG	2	YES	high	6	T4	8	0	14
30	75	NO	269.8	25.36	139	152	4.119	No	4	HRG	1	NO	high	4	T4	8	1	10
31	66	NO	650.6	56.71	128	125	4.91	No	5	HRG	1	YES	high	0	T4	9	1	2
32	77	NO	>100	0.74	137	66	2.71	No	4	HRG	2	NO	high	3	T2	7	1	7
33	80	NO	2788.6	1.06	145	799	5.46	No	6	HRG	2	YES	high	3	T3	9	1	9
34	48	NO	>100	72.19	151	52	3.786	No	5	HRG	2	YES	high	4	T3	7	0	7
35	62	NO	>100	0.02	141	91	2.28	No	2	LRG	1	NO	high	11	T2	7	0	17
36	84	YES	1830	4.45	148	1840	1.79	No	6	HRG	2	YES	high	2	T2	7	1	2
37	85	NO	10.46	2.36	114	69	2.49	No	4	HRG	1	YES	high	3	T4	8	1	19
38	68	NO	601	1.94	133	283	3	No	6	HRG	2	YES	high	2	T3	7	1	5
39	82	NO	15.02	0.01	130	104	3.423	No	2	LRG	1	YES	high	8	T2	8	1	9
40	62	NO	71.88	0.034	143	68	2.31	No	3	HRG	1	YES	high	15	T2	9	0	33
41	61	YES	375.6	15.87	138	124	3.78	No	4	HRG	1	NO	high	1	T4	8	0	26
42	71	NO	71.89	＜0.003	143	64	2.46	No	1	LRG	1	NO	low	8	T4	9	1	27
43	67	NO	18.63	0.05	142	64	3.591	No	2	LRG	1	YES	high	6	T4	9	1	28
44	66	YES	3998	0.03	134	64	2.9	No	3	HRG	1	NO	high	11	T3	7	0	11
45	84	NO	126.6	0.199	117	105	2.97	No	1	LRG	1	NO	low	24	T4	8	0	27
46	71	NO	>100	0.03	139	63	2.97	No	1	LRG	1	NO	low	7	T2	7	0	42
47	69	YES	79.25	1.4	109	195	4.82	No	5	HRG	2	YES	high	3	T3	7	1	6
48	62	NO	889.9	0.79	129	83	3.256	No	4	HRG	1	NO	high	8	T3	8	1	13
49	57	NO	>100	13.9	134	41	3.82	No	3	HRG	1	NO	low	6	T2	7	1	10
50	66	YES	73.84	2.83	134	66	2.37	No	5	HRG	1	YES	high	3	T2	9	1	4
51	61	NO	30.58	0.102	142	76	4.15	No	2	LRG	1	NO	high	6	T4	8	1	11
52	69	NO	>100	0.01	114	65	2.356	No	1	LRG	1	NO	low	11	T2	8	0	92
53	77	NO	150.2	12.13	110	115	2.14	No	2	LRG	1	YES	high	2	T4	10	1	7
54	66	YES	338.8	6.25	132	307	4.37	No	5	HRG	2	YES	high	5	T3	8	1	30
55	74	YES	1501	15.9	92	223	3.895	No	6	HRG	2	YES	high	3	T3	7	1	8
56	83	YES	59.67	0.019	150	47	6.41	No	2	LRG	1	NO	low	4	T3	8	0	14
57	78	NO	2067	0.79	108	3301	-	No	6	HRG	2	YES	high	3	T2	7	1	7
58	61	NO	20.3	0.19	137	72	4.818	No	2	LRG	1	NO	low	2	T3	8	1	3
59	75	NO	-	0.13	128	282	4.138	No	6	HRG	2	YES	high	9	T2	8	1	21
60	80	NO	33.8	1.46	119	62	3.742	No	1	LRG	1	NO	low	3	T3	7	0	9
61	69	YES	299.7	51.93	107	294	5.11	No	4	HRG	2	NO	high	4	T4	8	1	5
62	64	NO	>100	0.57	99	55	3.679	No	1	LRG	1	NO	low	3	T4	8	1	6
63	79	YES	104.8	0.23	120	612	6.03	No	6	HRG	2	YES	high	3	T2	9	1	9
64	75	NO	1006.3	67.1	77	273	4.81	No	6	HRG	2	YES	high	2	T1	8	1	7
65	73	YES	138.2	＜0.003	144	141	3.27	No	1	LRG	1	NO	low	8	T2	7	1	35
66	77	NO	＞100	16	147	—	—	No	6	HRG	2	YES	high	2	T4	9	1	10
67	76	YES	689	＜0.03	121	78	4.239	No	5	HRG	2	YES	high	12	T2	9	0	58
68	70	NO	144.6	0.46	143	73	4.98	No	1	LRG	1	NO	low	4	T4	8	1	11
69	78	YES	16.83	1.94	137	51	2.34	No	1	LRG	1	YES	low	6	T3	8	0	14
70	79	YES	＞100	4.72	110	1539	—	No	6	HRG	2	YES	high	1	T2	8	1	11
71	74	NO	406.1	4.1	88	209	4	No	5	HRG	2	YES	high	8	T3	10	1	14
72	74	YES	112.2	9.33	79	213	4.91	No	5	HRG	2	YES	high	4	T2	7	1	5
73	62	YES	＞100	＜0.006	141	595	3.87	No	5	HRG	2	YES	high	11	T3	7	0	14
74	58	NO	＞100	＞100	105	488	4.526	No	6	HRG	2	YES	high	16	T4	9	1	16
75	75	NO	378	0.77	99	81	4.61	No	4	HRG	1	NO	high	4	T2	7	0	19
76	77	YES	450.64	1.47	127	365	3.02	No	6	HRG	2	YES	high	14	T1	8	1	15
77	78	NO	53.05	0.01	124	96	3.423	No	1	LRG	1	NO	low	7	T4	8	0	82
78	73	NO	＞100	0.95	103	279	5.49	No	4	HRG	2	NO	high	1	T2	7	0	13
79	76	YES	14.82	0.47	148	148.5	3.429	No	2	LRG	1	NO	low	3	T4	9	0	6
80	82	NO	240.7	0.03	162	197	3.604	No	1	LRG	1	NO	low	11	T2	8	0	78
81	89	NO	1862	12.97	118	188	3.56	No	3	HRG	1	YES	high	2	T4	8	1	3
82	71	NO	＞100	0.03	119	492	2.68	No	6	HRG	2	YES	high	7	T4	8	1	10
83	67	NO	60.32	9.81	158	60	3.08	No	1	LRG	1	NO	low	1	T3	7	1	10
84	54	YES	＞100	1.13	120	1069	2.506	No	6	HRG	2	YES	high	6	T4	7	1	23
85	54	NO	1689	192.2	142	258	3.55	No	2	LRG	1	NO	low	3	T2	7	1	4
86	69	YES	18.33	0.067	102	79	4	No	3	HRG	1	YES	high	9	T4	8	1	12
87	64	NO	52.16	0.18	158	65	2.36	No	1	LRG	1	NO	low	2	T2	9	1	7
88	73	NO	—	0.15	148	—	2.839	No	2	LRG	1	NO	low	3	T2	7	1	6
89	80	YES	719.5	0.076	116	382	6.16	No	5	HRG	2	YES	high	9	T4	8	0	20
90	74	NO	2806.1	2.61	106	110	3.87	No	6	HRG	2	YES	high	7	T4	8	0	14
91	69	NO	＞154	1.8	133	505	4.1	No	5	HRG	2	YES	high	5	T4	7	1	10
92	78	NO	63.95	5.86	112	147	6.21	No	4	HRG	1	NO	high	0	T3	8	1	11
93	70	NO	37.91	4.03	139	410	6.47	No	6	HRG	2	YES	high	2	T2	7	1	3
94	72	NO	＞100	0.22	91	2732	4	No	6	HRG	2	YES	high	1	T2	8	1	11
95	73	YES	＞100	14.07	123	63	—	No	4	HRG	1	NO	high	1	T1	8	0	13
96	59	NO	189.8	5.66	130	209	3.86	No	6	HRG	2	YES	high	1	T4	8	1	14
97	80	NO	85.03	1.2	136	83	4.51	No	2	LRG	1	NO	low	0	T2	7	1	29
98	67	NO	407.5	18.98	126	111	2.918	No	3	HRG	1	YES	high	2	T3	7	1	9
99	66	NO	＞153	0.07	136	70	3.26	No	2	LRG	1	NO	low	5	T2	6	1	11
100	85	NO	140.3	1.98	125	50	3.92	No	1	LRG	1	NO	low	7	T2	7	1	14
101	87	NO	183.6	2.93	93	109	3.63	No	1	LRG	1	NO	low	1	T2	8	0	17
102	85	NO	＞150	2.03	115	399	4.049	No	6	HRG	2	YES	high	5	T4	7	1	17
103	77	NO	＞154	0.1	95	81	3.76	No	1	LRG	1	NO	low	2	T3	7	0	70
104	61	YES	157.9	5	114	70	8.019	No	5	HRG	2	YES	high	1	T4	6	1	14
105	54	NO	460	9.51	135	2698	2.7	No	5	HRG	2	YES	high	5	T1	6	1	9
106	74	NO	1982	86.83	71	211	4.6	No	6	HRG	2	YES	high	12	T2	9	1	12
107	74	YES	53.5	63.37	115	78	4.01	No	6	HRG	1	YES	high	2	T1	9	1	2
108	77	NO	＞100	95.05	123	274.4	2.97	No	5	HRG	2	YES	high	12	T3	8	1	14
109	62	YES	＞100	0.09	121	240	2.31	No	3	HRG	1	YES	high	4	T3	8	1	9
110	71	NO	1332	1.4	93	2261	4.94	No	6	HRG	2	YES	high	1	T4	9	1	5
111	59	NO	＞100	3.05	107	177	8.45	No	6	HRG	1	YES	high	2	T2	7	1	7
112	76	NO	223.4	52.41	124	67	5.91	No	1	LRG	1	NO	low	2	T2	9	1	8
113	81	NO	16.31	0.093	81	90	2.85	No	1	LRG	1	NO	low	13	T4	8	0	13
114	73	NO	81.01	0.06	154	64	6.06	No	2	LRG	1	NO	high	5	T2	7	1	29
115	91	NO	244.4	7.81	119	373	2.53	No	6	HRG	2	YES	high	5	T2	9	1	9
116	68	NO	＞154	1.818	160	97	3.485	No	4	HRG	1	NO	high	11	T3	8	1	11
117	70	YES	＞100	214.5	125	92	4.77	No	3	HRG	1	NO	high	0	T1	7	1	9
118	63	YES	99.14	0.33	108	83	3.94	No	4	HRG	1	NO	high	3	T4	9	1	25
119	58	NO	23.89	0.22	163	279	18.7	No	2	LRG	1	NO	high	4	T2	7	1	36
120	80	NO	49.65	19.13	128	471	—	No	6	HRG	2	YES	high	7	T2	8	1	19
121	75	YES	＞100	＜0.003	114	84	5.28	No	2	LRG	1	NO	low	17	T3	8	0	31
122	89	NO	442.4	2.14	128	87	—	No	4	HRG	1	NO	high	6	T4	9	1	12
